# Supplementary material for: Prevalence and predictability of the Chicago Classification of Pouchitis in ulcerative colitis: a multicenter study in Japan
Source: Springer Nature journal article supplement (doi:10.1007/s00535-025-02231-1), 2025-03-06

**Fig. S1**

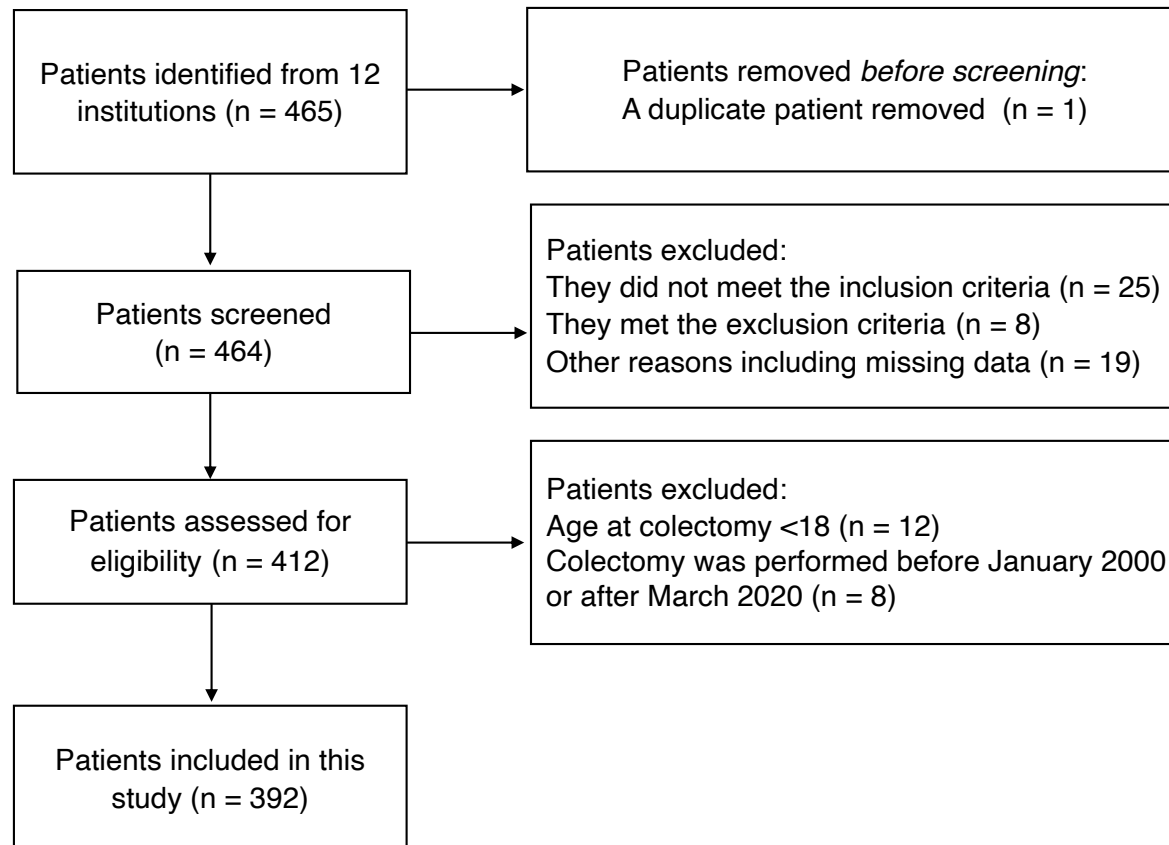

**Fig. S2** All patients included in the analysis (n = 317)

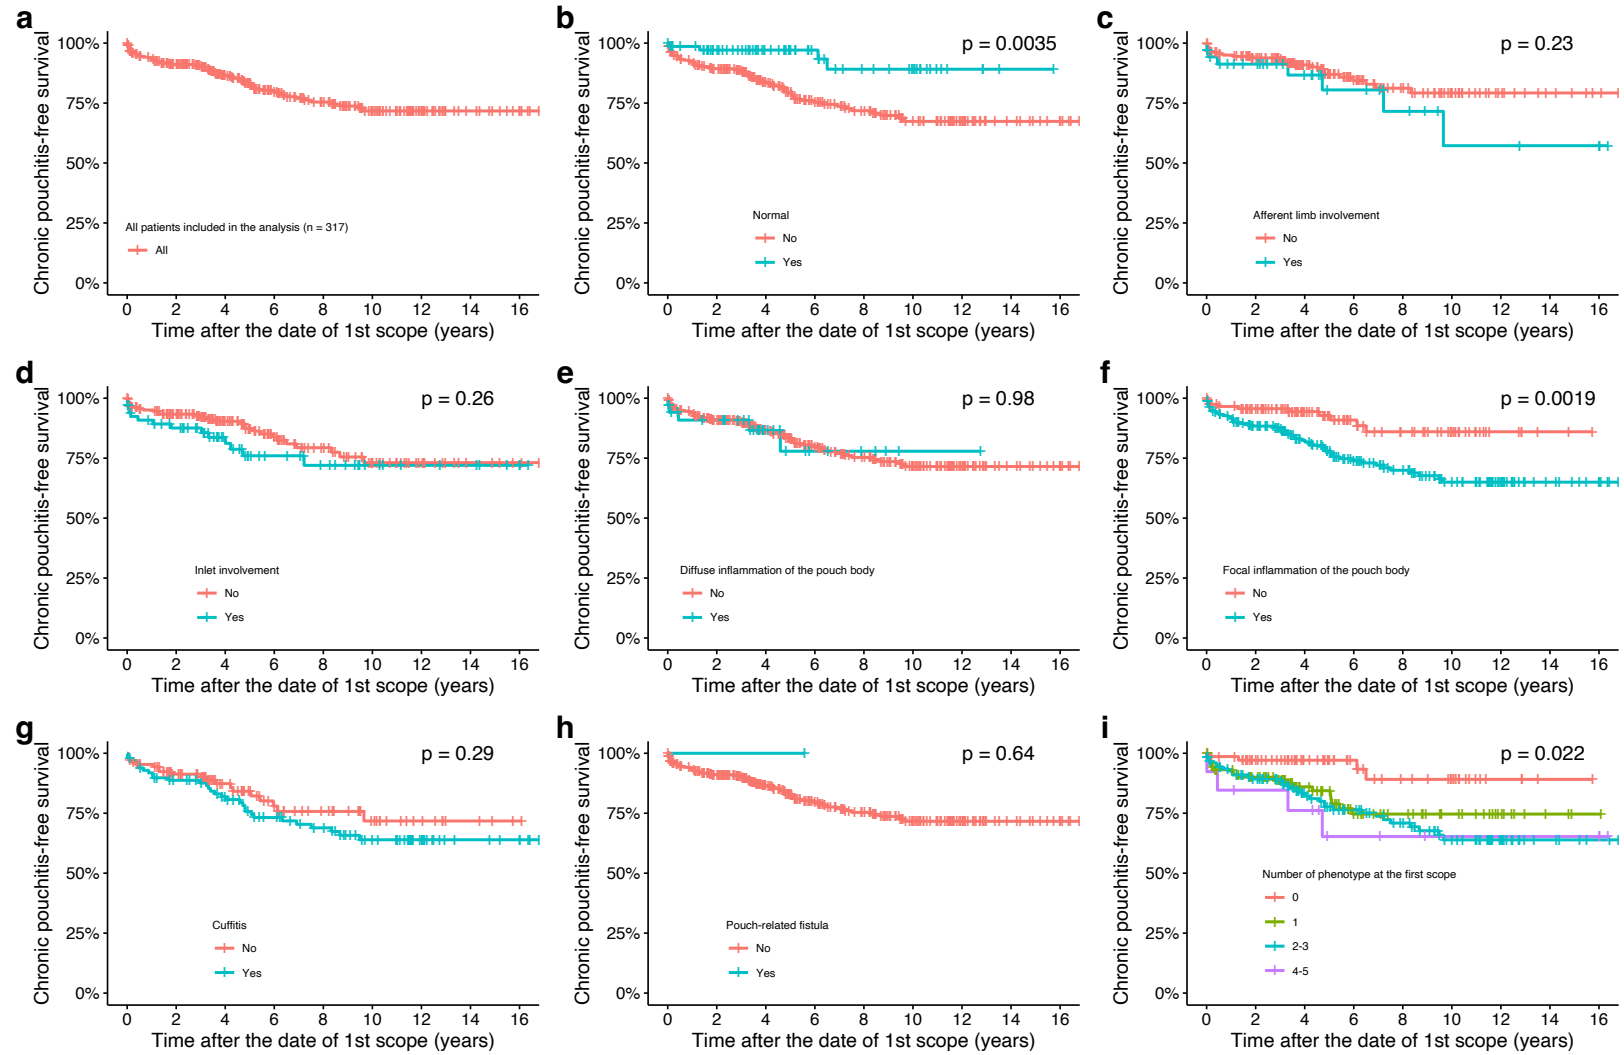

**Fig. S3** Asymptomatic patients at the initial pouchoscopy (n = 119)

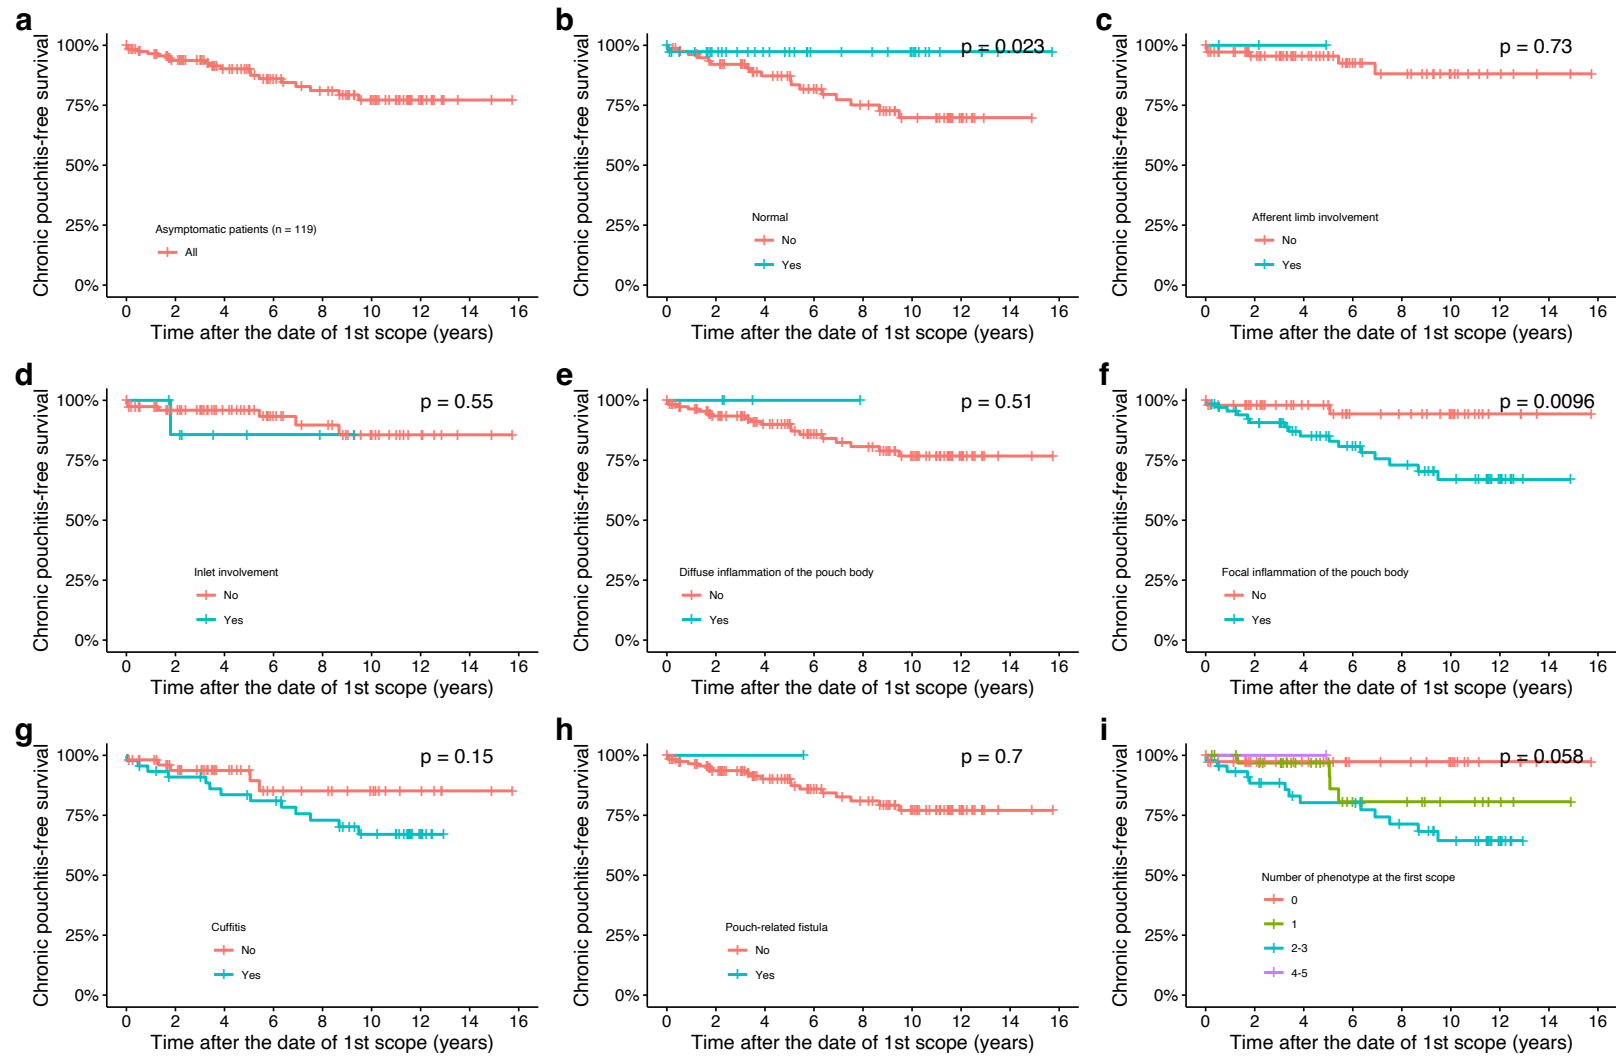

**Fig. S4**

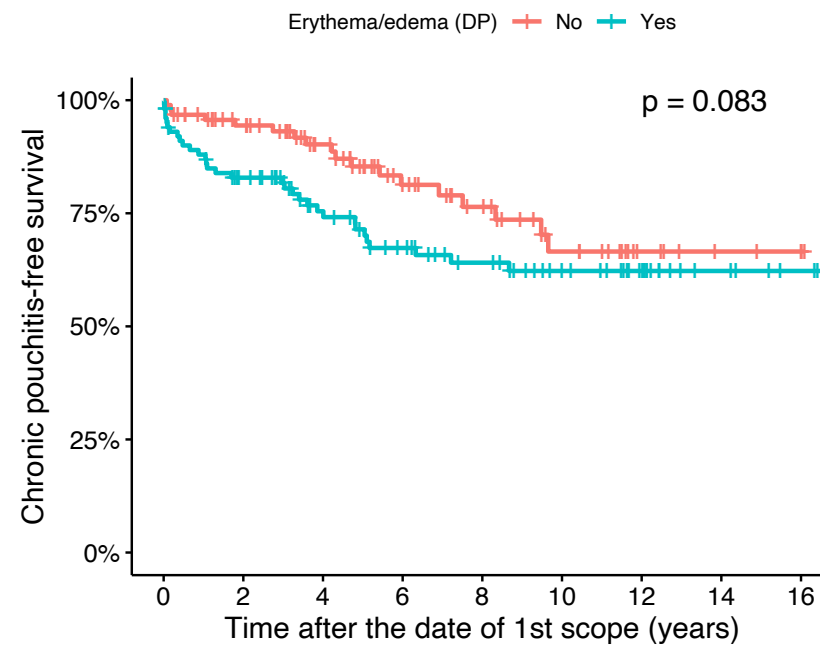

**Fig. S5**

Initial scope

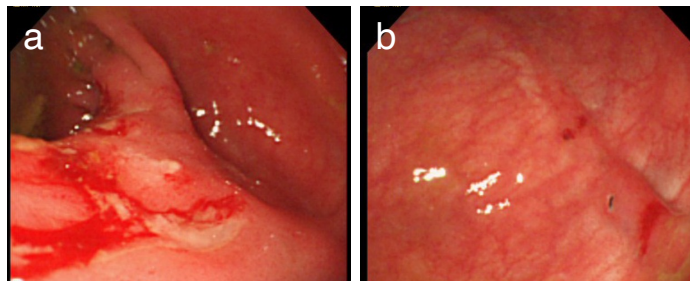

6 years later

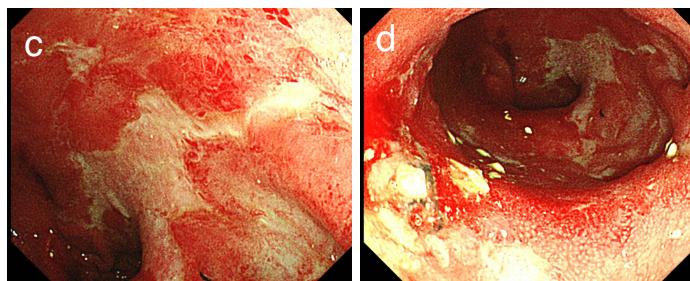

9 years later

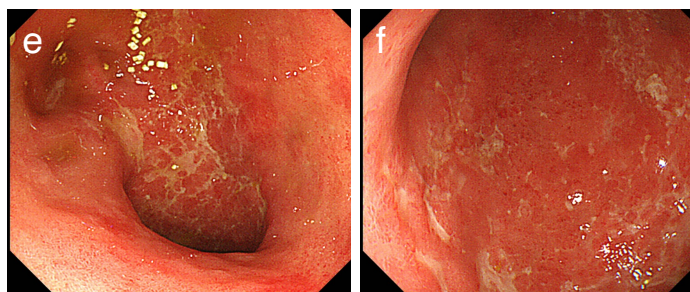

**Fig. S6** All patients included in the analysis (n = 376)

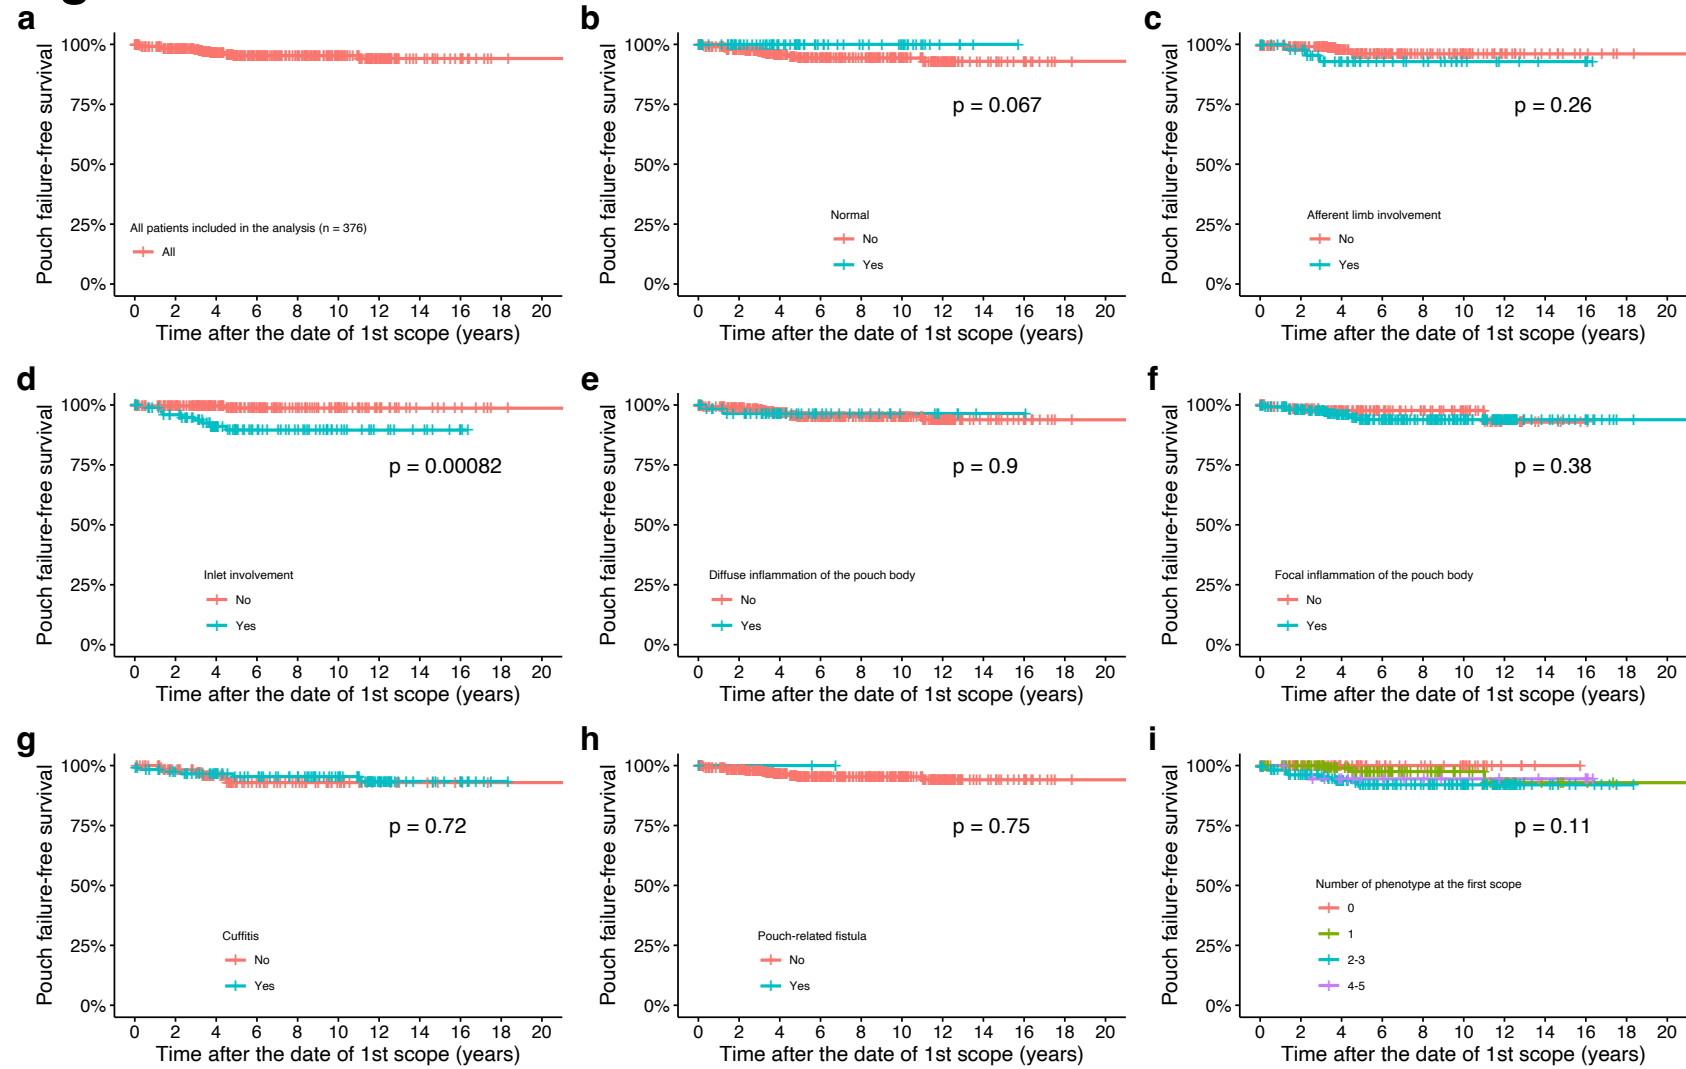

**Fig. S7** Asymptomatic patients at the initial pouchoscopy (n = 121)

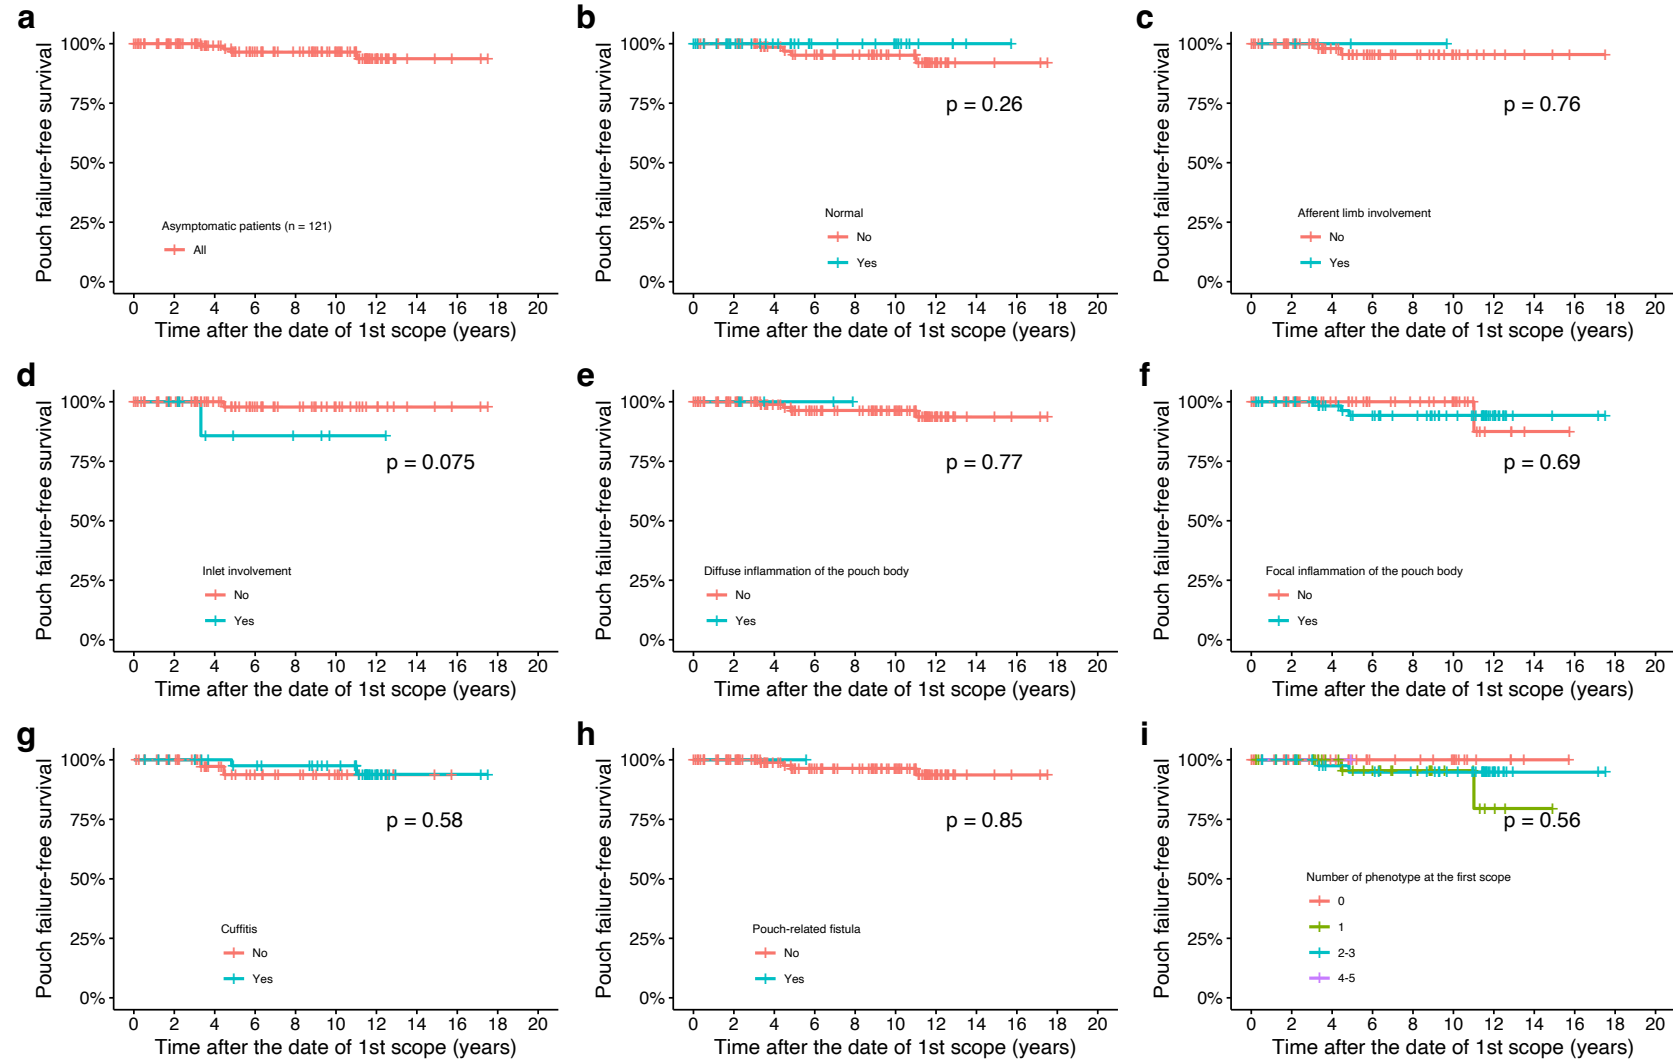

**Fig. S8**

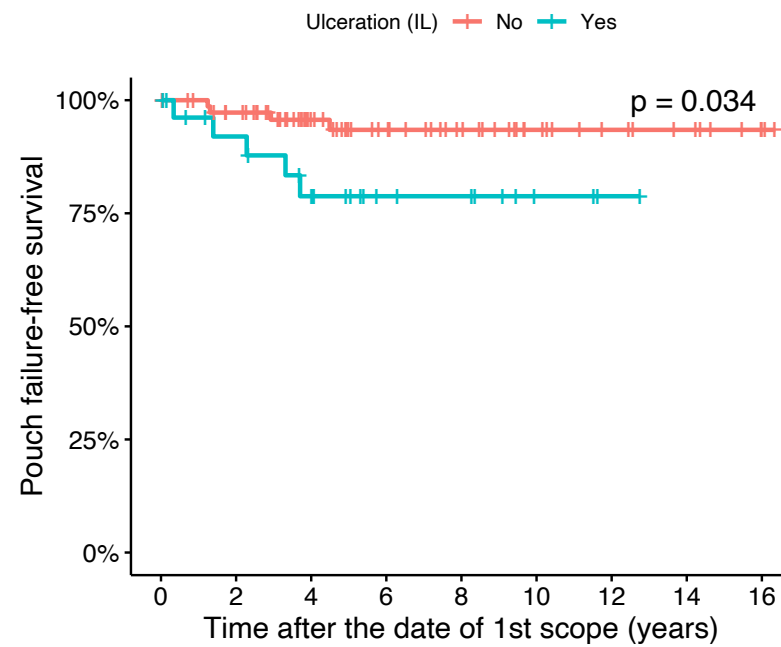



**Fig. S9**

Initial scope

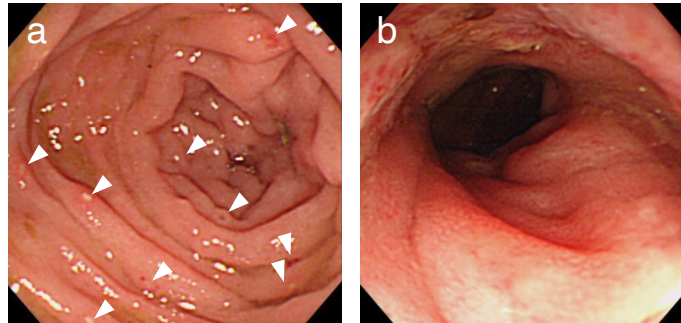

1 year later

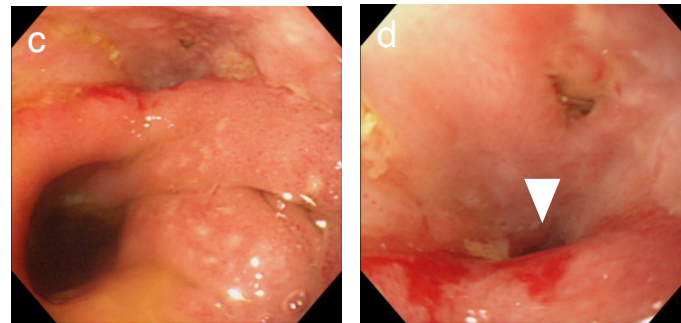

3 years later

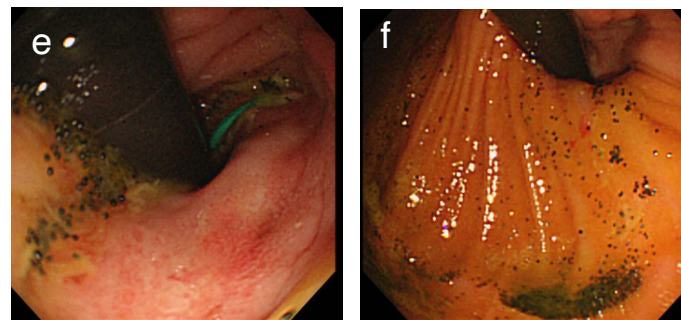

**Fig. S10**

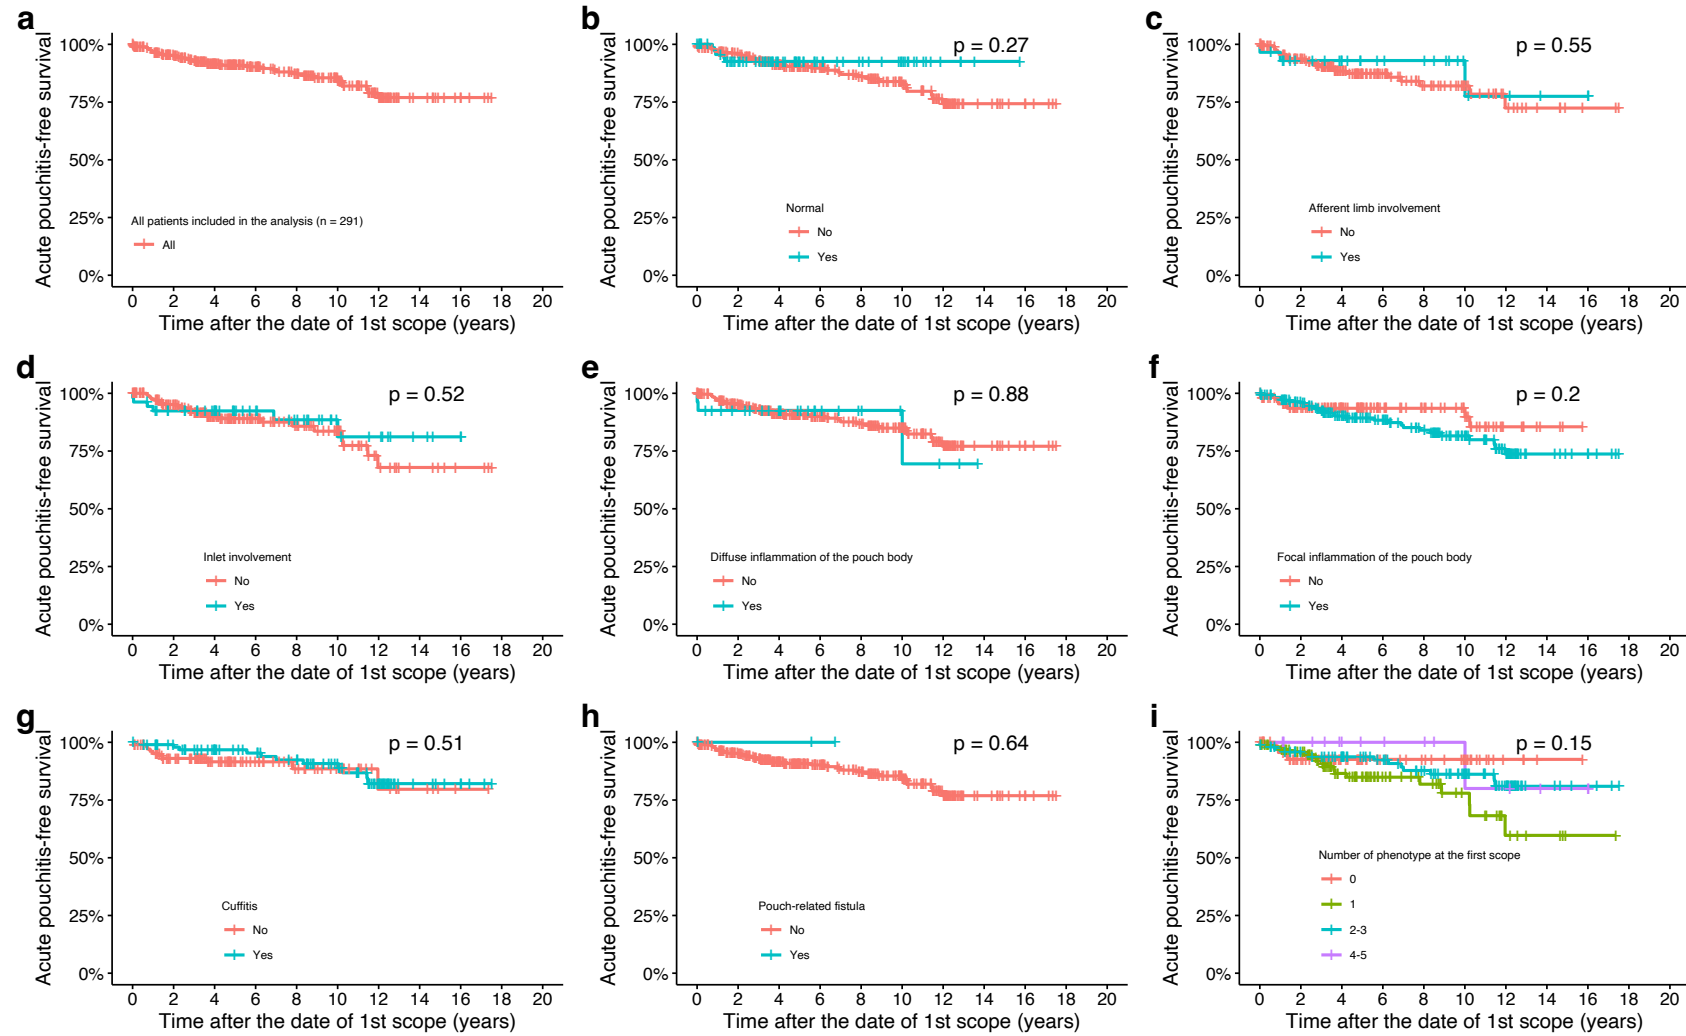

Supplement: MOESM2 [file 535_2025_2231_MOESM2_ESM.pdf]
